# Supplementary material for: Pillared-layered indium phosphites templated by amino acids: isoreticular structures, water stability, and fluorescence
Source: Royal Society of Chemistry journal article supplement (doi:10.1039/d0dt03226c), 2020-01-01
Supplement: d0dt03226c1.pdf [file d0dt03226c1.pdf]

**Pillared-layered indium phosphites templated by amino acids:  
isorecticular structures, water stability, and fluorescence**

Yumei Mao,<sup>a</sup> Yuandan Deng,<sup>a</sup> Lindong Luan,<sup>\*b</sup> Hongmei Zeng,<sup>a</sup> Guohong Zou<sup>a</sup> and  
Zhien Lin<sup>\*a</sup>

<sup>a</sup> *College of Chemistry, Sichuan University, Chengdu 610064, P. R. China.*

<sup>b</sup> *Department of Criminal Investigation, Sichuan Police College, Luzhou 646000, P. R.  
China*

\* To whom correspondence should be addressed. Tel: +86-28-85412284. E-mail:

luanld@scpolicec.edu.cn (L. Luan); zhienlin@scu.edu.cn (Z. Lin)

### **Physical measurements:**

Powder X-ray diffraction (XRD) data were obtained using a Rigaku D/MAX-rA diffractometer with Cu-K $\alpha$  radiation ( $\lambda = 1.5418 \text{ \AA}$ ). The elemental analysis was carried out on an Elementar Vario EL III analyzer. IR spectra (KBr pellets) were recorded on a Nicolet Impact 410 FTIR spectrometer. The thermogravimetric analyses were performed on a Netzsch STA 449c analyzer in a flow of N<sub>2</sub> with a heating rate of 10 °C/min. The fluorescent spectrum was collected on a FS5 Spectrofluorometer (Edinburgh instruments) equipped with a 150 W CW Ozone-free xenon arc lamp. Alternating current impedance measurements were carried out with a Solartron SI 1260 impedance/gain-phase analyzer over the frequency range from 0.1 Hz to 32 MHz with an applied voltage of 10 mV. The relative humidity was controlled by a STIK Corp. CIHI-150B incubator. The sample was pressed to form a cylindrical pellet of crystalline powder sample (~2 mm thickness  $\times$  5 mm  $\phi$ ) coated with C-pressed electrodes. Two silver electrodes were attached to both sides of pellet to form four end terminals (quasi-four-probe method). Single crystal X-ray diffraction data were collected on a New Gemini, Dual, Cu at zero, EosS2 diffractometer at room temperature. The crystal structures were solved by direct methods. The structures were refined on  $F^2$  by full-matrix least-squares methods using the *SHELXTL* program package.<sup>1</sup>

### *Reference*

1. G. M. Sheldrick, Acta Cryst., Sect. A, 2008, 64, 112.

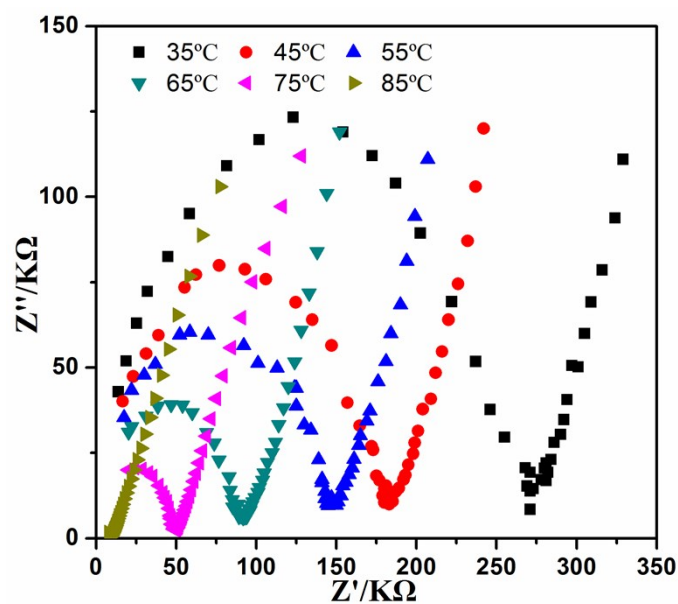

**Fig. S1.** Nyquist plots of SCU-31 at different temperature under 95% RH. The conductivity is  $7.1 \times 10^{-6} \text{ S}\cdot\text{cm}^{-1}$  at 35 °C,  $1.0 \times 10^{-5} \text{ S}\cdot\text{cm}^{-1}$  at 45 °C,  $1.3 \times 10^{-5} \text{ S}\cdot\text{cm}^{-1}$  at 55 °C,  $2.1 \times 10^{-5} \text{ S}\cdot\text{cm}^{-1}$  at 65 °C,  $3.8 \times 10^{-5} \text{ S}\cdot\text{cm}^{-1}$  at 75 °C, and  $2.2 \times 10^{-4} \text{ S}\cdot\text{cm}^{-1}$  at 85 °C.

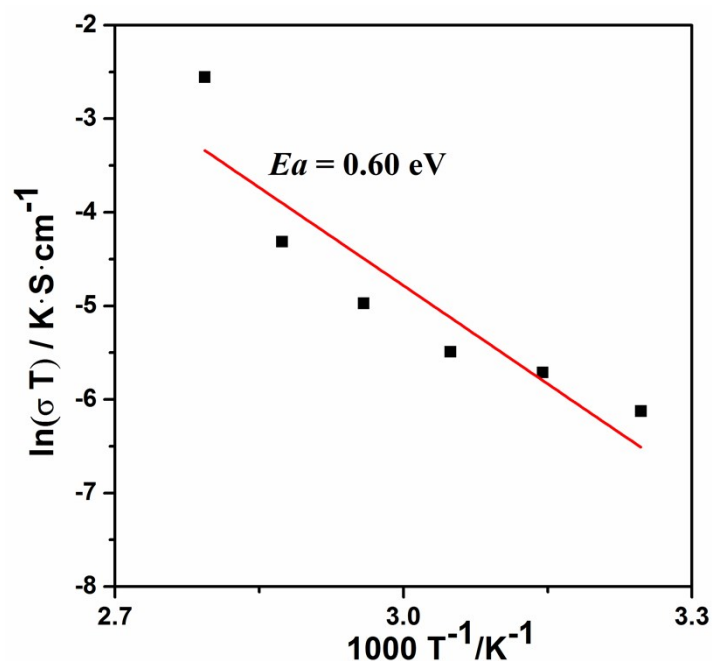

**Fig. S2.** Arrhenius plot of the proton conductivity of SCU-31 under 95% RH.

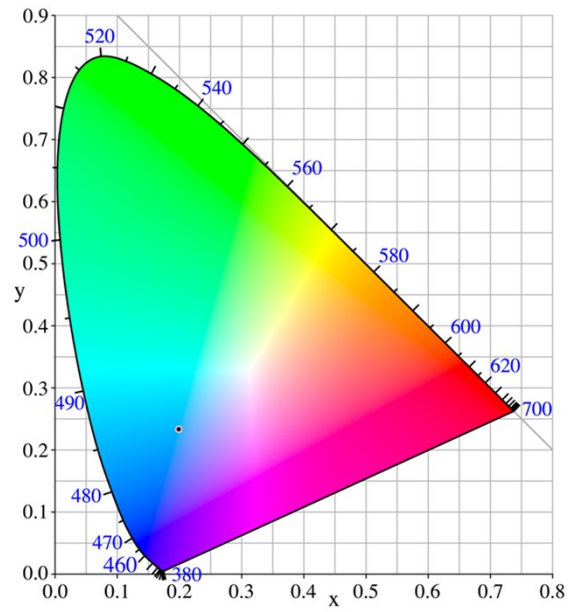

**Fig. S3.** The CIE coordinates for the powder sample of SCU-31 (0.1984, 0.2328).

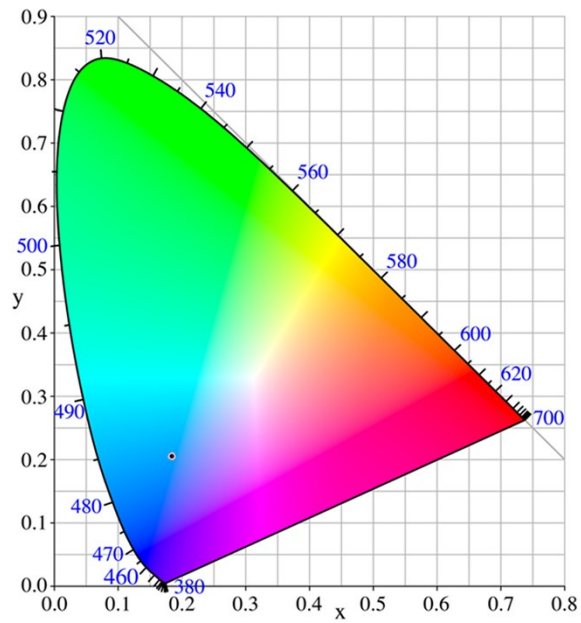

**Fig. S4.** The CIE coordinates for the powder sample of SCU-32 (0.1842, 0.2050).

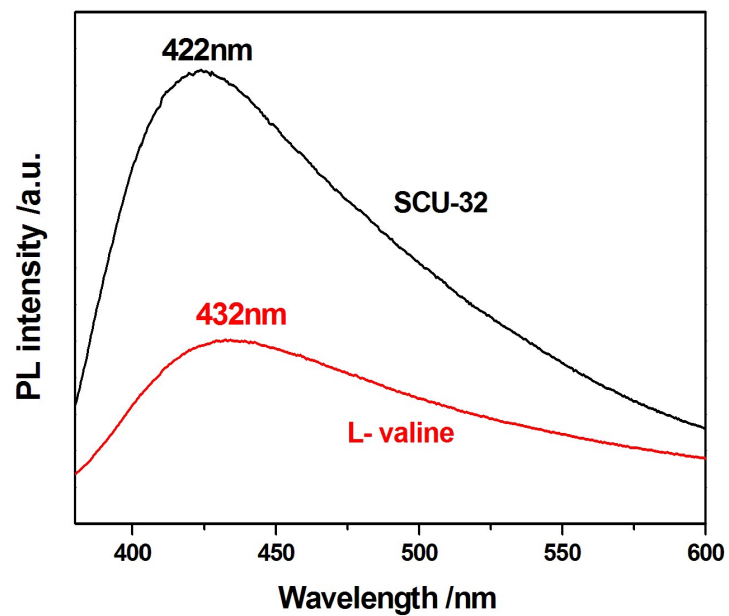

**Fig. S5.** The photoluminescent spectra of SCU-32 and L-valine.

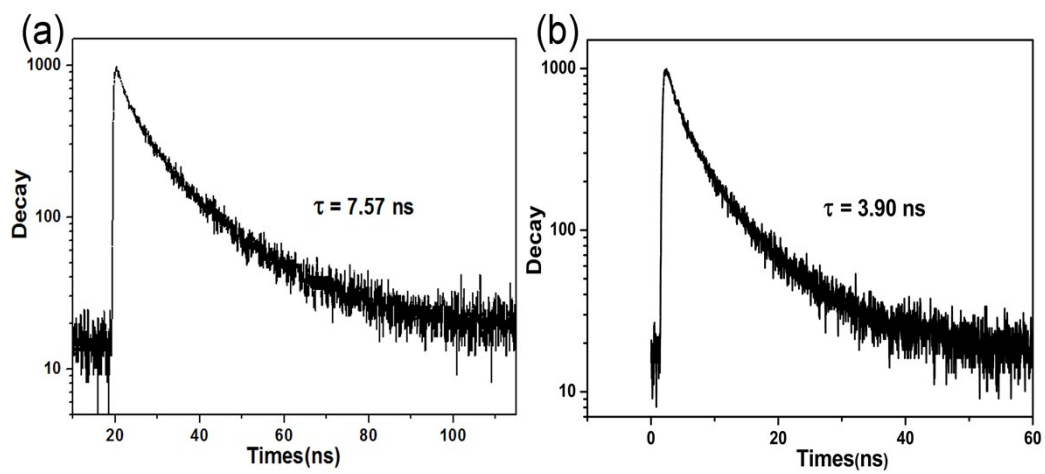

**Fig. S6.** The lifetime of (a) SCU-31 and (b) SCU-32.

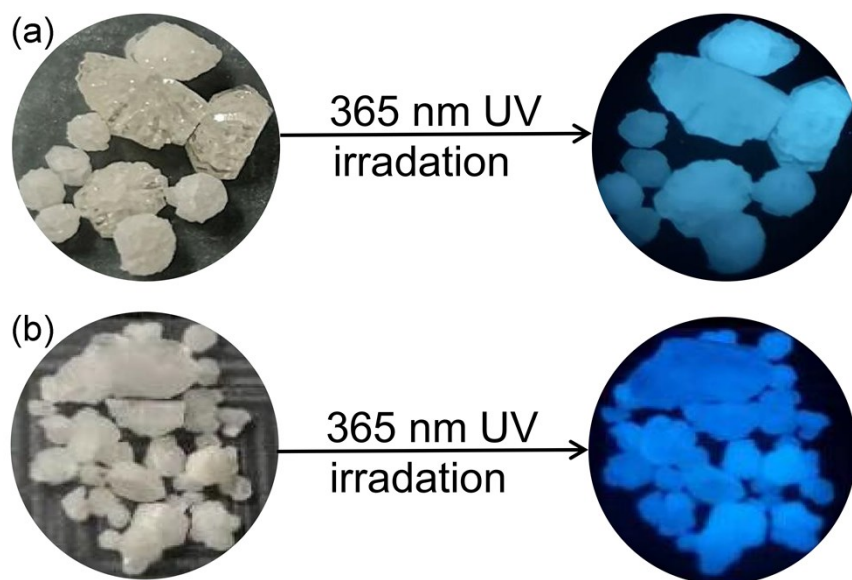

**Fig. S7.** Photos of (a) SCU-31 and (b) SCU-32 under exposure of portable UV lamp.

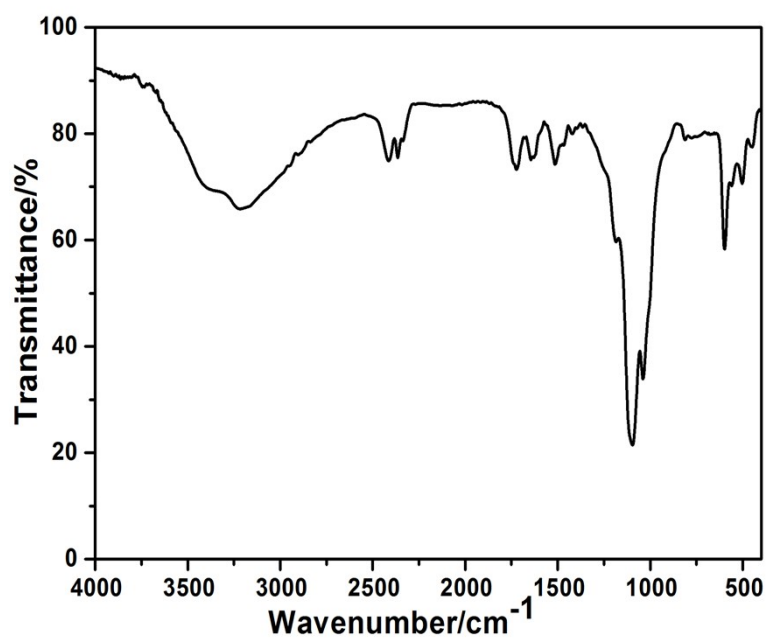

**Fig. S8.** IR spectrum of SCU-31.

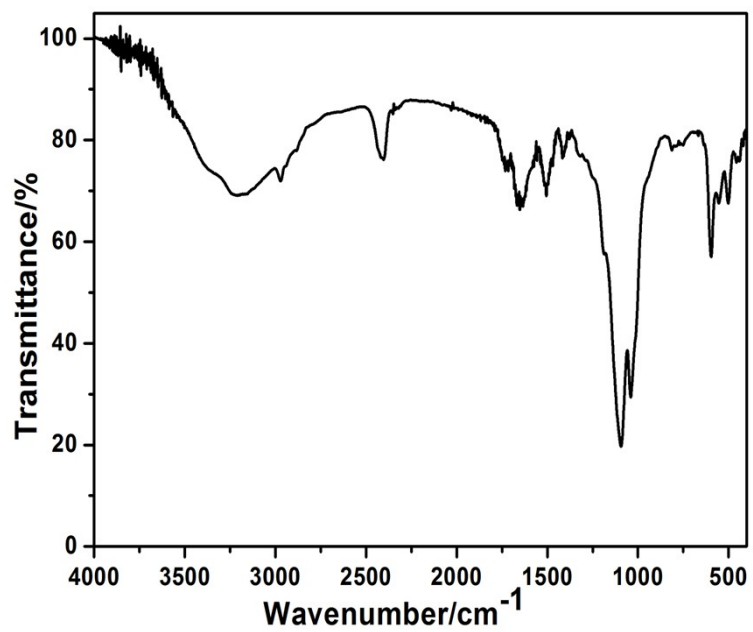

Fig. S9. IR spectrum of SCU-32.

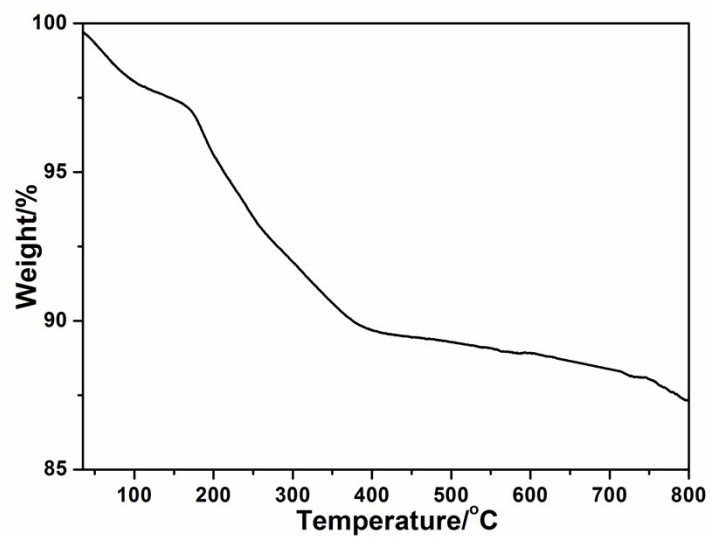

Fig. S10. TGA curve of SCU-31.

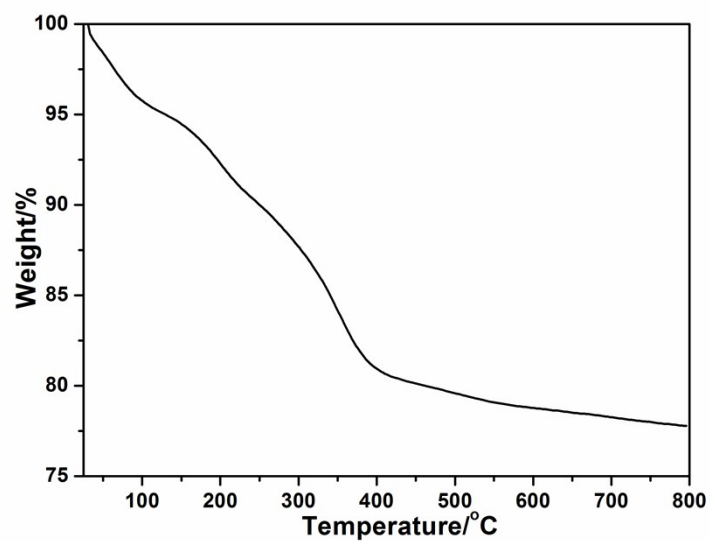

**Fig. S11.** TGA curve of SCU-32.

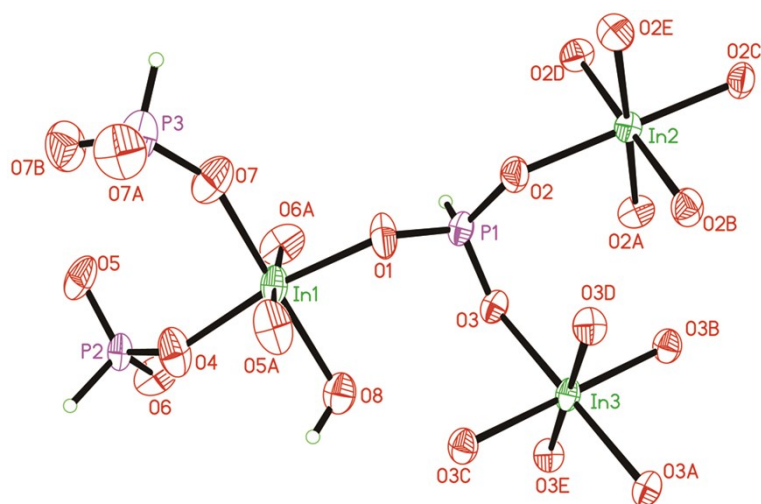

**Fig. S12.** View of the coordination environments for In and P in the asymmetric unit of SCU-31, showing the atom-labeling scheme and 50% thermal ellipsoids. Atom labels having “A”, “B”, “C”, “D” and “E”, refer to symmetry-generated atoms.



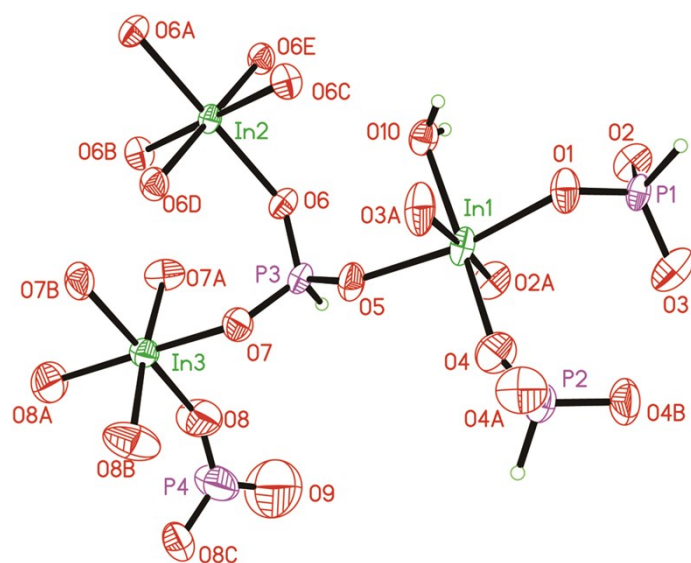

**Fig. S13.** View of the coordination environments for In and P in the asymmetric unit of SCU-32, showing the atom-labeling scheme and 50% thermal ellipsoids. Atom labels having “A”, “B”, “C”, “D” and “E”, refer to symmetry-generated atoms.

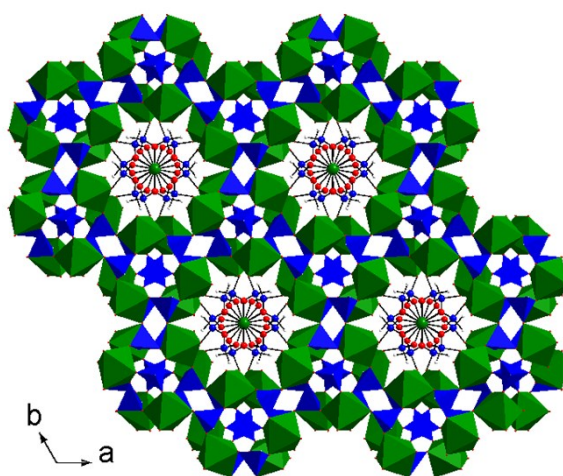

**Fig. S14.** A view of the structure of SCU-31 along the [001] direction.

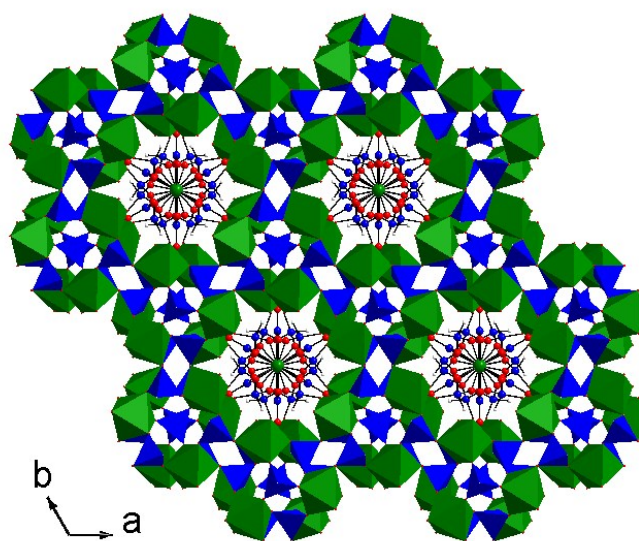

**Fig. S15.** A view of the structure of SCU-32 along the [001] direction.

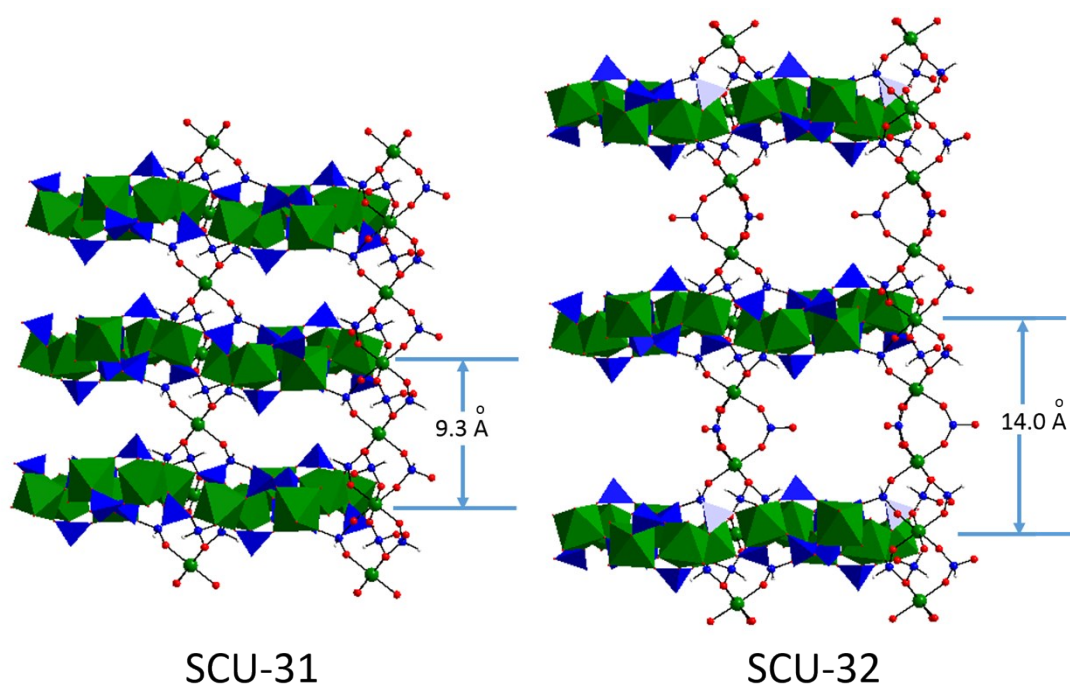

**Fig. S16.** Comparison of the lengths of inorganic pillars between two adjacent layers in SCU-31 and SCU-32.
